# Supplementary material for: Journal Impact Factor: Do the Numerator and Denominator Need Correction?
Source: PLoS One. 2016 Mar 15;11(3):e0151414. doi: 10.1371/journal.pone.0151414 (PMC4792445; doi:10.1371/journal.pone.0151414)
Supplement: S2 Dataset — (XLS) [file pone.0151414.s002.xls]

## Sheet: original responses
ADVANCES IN MATHEMATICS	AMERICAN JOURNAL OF MATHEMATICS	AMERICAN MATHEMATICAL MONTHLY	ANNALS OF MATHEMATICS	Asian Journal of Mathematics	BULLETIN OF THE AMERICAN MATHEMATICAL SOCIETY	COMMUNICATIONS ON PURE AND APPLIED MATHEMATICS	DUKE MATHEMATICAL JOURNAL	EXPERIMENTAL MATHEMATICS	FOUNDATIONS OF COMPUTATIONAL MATHEMATICS	HISTORIA MATHEMATICA	HOUSTON JOURNAL OF MATHEMATICS	INDIANA UNIVERSITY MATHEMATICS JOURNAL	JOURNAL OF THE AMERICAN MATHEMATICAL SOCIETY	JOURNAL OF MATHEMATICAL ANALYSIS AND APPLICATIONS	Lecture Notes in Mathematics	Mathematical Control and Related Fields	MATHEMATICAL INTELLIGENCER	MATHEMATICAL RESEARCH LETTERS	MEMOIRS OF THE AMERICAN MATHEMATICAL SOCIETY	MICHIGAN MATHEMATICAL JOURNAL	New York Journal of Mathematics	PROCEEDINGS OF THE AMERICAN MATHEMATICAL SOCIETY	PACIFIC JOURNAL OF MATHEMATICS	Pure and Applied Mathematics Quarterly	ROCKY MOUNTAIN JOURNAL OF MATHEMATICS	TRANSACTIONS OF THE AMERICAN MATHEMATICAL SOCIETY
8	9	9	10	7	10	9	9	0	0	0	7	9	9	9	9	0	10	8	9	9	7	10	10	8	9	0
10	9	10	10	0	0	9	0	0	0	0	0	0	10	0	8	0	10	0	0	0	0	0	0	0	8	10
3	3	3	1	8	2	7	2	4	0	0	8	0	2	0	0	0	9	0	2	5	5	2	3	0	6	2
8	9	7	8	6	9	9	8	0	9	8	8	8	9	9	8	8	8	8	9	9	9	9	8	8	8	9
10	10	10	10	0	8	10	8	7	0	0	0	7	8	7	10	0	8	0	10	7	0	8	7	0	7	9
8	10	10	10	0	10	0	0	0	0	0	0	0	10	0	10	0	8	0	10	8	7	9	8	0	7	10
10	0	8	10	0	9	0	3	0	0	1	0	0	7	0	10	0	8	0	10	0	0	10	6	0	2	10
8	7	8	7	0	8	2	4	0	0	9	0	5	0	0	9	0	8	0	7	5	0	7	7	0	3	9
8	8	8	10	0	10	9	8	0	0	0	5	0	10	0	7	0	8	7	10	7	0	5	7	0	3	7
0	0	9	10	0	7	0	0	8	0	0	0	0	0	0	6	0	8	0	0	0	0	0	0	0	5	0
9	9	8	10	5	10	9	8	5	5	5	7	8	10	8	7	7	7	8	8	9	8	8	8	8	8	9
9.5	9.5	8	10	8	8	9.5	9.5	7	7	7	7.5	9	9.5	7	7	7	7	7	9	8	8	8.5	8	8	7.5	9
10	9	5	10	5	6	8	9	7	7	5	6	7	10	7	7	6	6	8	8	7	8	8	7	6	6	8
8	10	7	10	5	8	6	9	8	6	4	3	4	8	6	7	5	6	7	8	7	7	7	6	5	5	6
8	10	6	10	0	6	6	6	0	0	6	3	3	10	8	10	0	6	6	10	6	0	10	8	6	6	4
10	8	9	7	5	10	8	9	7	8	5	7	7	9	6	8	0	6	0	9	7	4	8	7	5	7	8
8	7	7	9	4	5	7	5	7	7	8	4	5	8	10	9	5	5	6	7	8	5	7	7	7	8	8
5	4	8	10	4	6	5	6	4	4	0	4	4	6	0	8	4	5	6	5	5	4	7	5	0	4	7
9	9	8	10	7	7	7	9	8	5	4	4	9	10	4	5	4	5	7	7	8	8	8	8	7	5	9
9	10	2	10	3	7	8	8	4	3	2	5	5	10	7	6	3	5	6	8	5	4	6	7	3	3	8
8	7	0	10	0	5	6	9	6	0	0	0	0	10	0	9	0	5	7	7	6	0	4	5	0	0	8
10	8	5	8	0	9	6	8	7	0	0	4	6	9	3	8	0	5	8	8	7	4	7	5	0	3	8
9	9	5	10	6	7	0	9	7	0	0	5	6	10	0	8	0	5	8	0	6	6	7	6	0	5	8
7	9	5	10	6	8	8	8	5	7	0	4	5	8	4	7	0	5	6	6	7	0	7	7	6	7	8
3	6	3	10	5	6	3	8	3	3	0	4	4	9	3	6	0	5	4	5	4	0	6	5	0	4	5
8	8	5	10	5	8	6	8	7	0	6	4	4	8	0	6	0	5	7	7	6	5	7	7	7	6	8
0	0	7	10	0	7	8	9	5	0	0	5	8	10	0	0	0	5	7	7	7	5	7	5	0	3	7
8	0	5	10	8	10	0	0	0	0	10	0	8	10	0	0	0	5	0	6	8	8	8	8	0	1	10
8	8	6	10	5	10	9	9	8	8	5	4	8	10	5	10	6	4	5	8	6	5	7	6	7	5	8
8	9	5	9	7	8	9	8	0	0	6	6	7	8	8	8	0	4	5	8	8	5	6	7	0	6	7
9	9	5	10	3	5	7	8	5	0	2	7	7	9	0	8	0	4	0	9	8	6	8	8	0	6	9
7.5	7.5	5	9	0	6.7	0	8	5	0	0	0	0	7.5	0	8	0	4	6.7	6	0	0	5	4	0	2	6.7
7	6	4	10	0	6	0	8	0	0	0	5	5	9	0	7	0	4	7	7	6	0	6	5	0	4	7
9	9	5	10	6	9	8	0	0	0	0	4	6	10	5	6	0	4	7	8	4	0	5	6	0	4	8
7	8	4	10	4	5	6	7	6	0	3	3	0	10	5	6	0	4	7	5	4	4	4	4	0	3	5
5	7	3	10	3	5	5	7	5	0	4	2	2	8	5	6	0	4	6	5	3	3	3	4	4	3	5
8	8	5	10	0	8	7	7	0	0	0	3	5	9	6	0	0	4	6	8	4	0	6	7	0	3	7
8	0	3.5	9.5	0	5	7	8.7	4	0	0	0	5.5	9.6	0	0	0	3.9	0	6	0	0	4.9	3.5	0	0	6.1
6	5	4	9	7	7	9	8	4	4	6	3	7	9	5	7	5	3	7	8	6	4	6	4	5	4	8
3	3	5	3	3	5	3	3	3	3	3	5	3	3	3	10	3	3	3	5	3	3	7	3	3	3	7
9	9	3	10	2	9	9	9	2	2	2	2	8	10	4	7	1	3	8	10	6	6	8	6	5	2	8
2	2	4	2	1	1	1	1	1	1	2	1	1	2	1	2	1	3	2	2	2	2	1	1	1	1	1
6	6	3	9	0	4	8	5	2	6	0	6	7	6	9	8	0	3	4	7	4	0	8	8	0	4	8
8	10	2	10	4	6	0	6	0	0	4	5	6	7	0	8	0	3	0	8	6	0	5	6	0	5	7
7	7	4	10	2	6	4	8	0	0	0	2	2	10	0	7	0	3	6	7	3	0	4	5	0	4	7
0	6	5	8	0	4	6	5	0	0	0	0	0	7	4	5	0	3	0	4	3	4	3	4	0	3	3
8	7	2	7	0	7	0	7	0	0	0	7	8	10	0	0	0	3	0	8	7	5	9	8	0	7	10
9	9	3	10	0	0	3	7	0	0	0	0	0	9	0	0	0	3	0	7	7	0	6	6	0	4	9
5	5	1	6	3	1	8	2	0	2	2	3	3	5	10	10	3	2	2	2	1	0	7	7	4	4	8
7	6	5	10	1	8	5	9	3	3	1	5	5	9	3	8	2	2	8	8	5	5	7	6	2	5	7
7	0	0	10	2	4	8	6	3	0	0	2	1	7	5	9	0	2	6	2	1	0	3	1	0	1	5
8	8.5	3	10	0	9	7	8.75	5	0	0	0	6	10	4	9	0	2	6	8	6	5	5	5	5	4	7
9	7	5	9	0	6	4	3	6	0	1	2	3	9	0	9	0	2	5	6	3	1	6	3	0	3	7
9	9.5	8	10	0	9.5	0	9.5	0	0	0	3	3	10	7	8	0	2	8	8	6	4	6	5	0	4	8
8	8	4	10	5	8	9	9	5	8	0	2	7	10	4	8	0	2	6	7	6	5	5	5	4	3	7
0	0	10	0	0	10	3	5	0	0	2	3	6	10	9	7	0	2	2	9	8	0	10	8	1	7	10
5	5	8	10	1	9	10	8	5	7	7	5	8	7	9	7	0	2	4	5	3	2	9	6	7	8	10
6	6	4	10	4	7	6	6	5	3	1	1	2	8	7	7	0	2	2	8	6	3	8	5	5	4	8
6	8	2	10	0	5	0	7	0	0	0	7	7	8	0	7	0	2	0	7	7	0	8	6	0	5	8
8	5	4	4	3	4	4	4	0	0	3	2	3	5	4	5	0	2	2	3	4	5	5	4	4	3	7
8	9	4	10	0	8	0	9	6	0	0	0	7	10	6	0	0	2	6	9	7	6	7	6	0	5	8
7	6	2	10	4	7	8	8	5	0	0	3	3	10	0	0	0	2	6	7	5	5	6	5	0	0	5
9	1	2	2	1	3	2	2	2	2	1	3	1	1	5	9	1	1	1	1	1	1	5	1	1	1	1
10	10	5	10	7	2	7	5	1	7	1	1	2	7	5	8	1	1	1	8	7	2	2	5	3	1	10
5	5	5	10	3	8	7	8	1	1	1	1	2	10	3	7	1	1	4	5	3	3	4	5	2	1	5
5	5	3	10	2	6	10	8	3	3	1	3	3	9	4	4	1	1	2	7	3	2	7	3	4	3	7
4	7	2	9	1	9	7	5	0	0	0	1	5	5	3	3	1	1	2	7	3	2	3	3	4	2	7
5	4	2	4	1	2	1	2	1	1	1	1	1	5	3	1	1	1	3	5	1	1	4	1	1	3	2
9.8	9	7	10	3	9.2	8	9.5	2	0.5	0.1	4	6.5	9.8	9.2	8	0.1	1	8.5	9	6.5	1	7.9	7	8	4.2	9
10	10	5	10	0	8	10	10	0	0	0	2	8	10	8	8	0	1	10	10	8	0	8	3	0	2	8
5	3	1	8	3	4	2	3	3	1	1	1	1	4	5	5	0	1	0	7	2	0	7	3	0	1	9
8.5	8	2	10	0	3	0	9	6	0	0	0	0	10	0	5	0	1	7	0	0	5	6	6.6	0	5	8
6.5	7	1.5	10	0	3	0	8	4.7	0	0	2.5	5	9	5	0	0	1	5.5	4	4.3	0	4	5	0	2.5	5
6	5	3	6	1	2	0	5	1	0	0	1	2	5	0	0	0	1	0	4	4	1	5	3	0	2	5
10	10	10	10	7	10	10	10	5	5	0	5	3	0	7	10	0	0	0	10	7	0	5	5	0	5	7
7	9	2	10	5	3	5	9	3	0	0	2	4	10	0	9	0	0	6	9	6	5	7	7	0	4	8
0	0	2	10	0	5	10	7	0	0	0	0	6	0	0	9	0	0	7	8	10	0	8	6	0	0	6
0	0	5	5	0	7	9	7	0	0	0	5	5	0	6	8	0	0	0	0	5	0	9	0	0	0	8
7	5	2	10	5	4	3	8	3	0	0	0	0	9	0	8	0	0	6	6	4	4	5	5	0	3	4
0	0	5	10	0	10	0	0	0	0	0	0	0	8	0	8	0	0	0	7	0	0	0	0	0	0	0
8	0	6	10	0	6	0	9	0	0	0	0	0	7	0	8	0	0	0	8	0	0	7	0	0	0	6
0	0	0	0	0	5	0	0	0	0	0	0	0	5	0	8	0	0	0	0	0	0	0	0	0	0	0
8	10	5	10	7	5	0	6	0	0	0	5	7	0	0	8	0	0	0	0	7	6	4	7	0	0	7
6	6	5	8.5	4	8	7.5	8.5	0	0	0	4	6.5	8	7	7.5	0	0	0	8	7.5	0	9	7	0	5	9
6	8	7	10	5	7	6	9	0	0	0	1	0	10	1	7	0	0	7	7	4	4	5	4	3	1	6
7	8	3	10	0	0	0	9	0	0	0	0	4	10	0	7	0	0	0	8	0	5	5	4	0	0	5
9	8	0	10	3	5	0	9	3	0	0	1	3	10	0	7	0	0	6	6	0	0	5	4	0	0	5
8	7	8	10	0	9	0	9	4	0	0	0	0	10	0	7	0	0	5	7	6	0	4	4	0	0	6
9	0	8	10	0	9	0	0	0	0	0	0	0	9	0	7	0	0	0	0	0	0	7	0	9	0	0
6	9	7	7	5	7	5	0	0	0	0	0	0	8	0	7	0	0	0	9	0	0	8	5	8	0	5
9	5	0	8	0	7	9	8	0	0	0	0	0	7	0	7	0	0	0	0	0	0	7	0	0	0	8
0	7	0	7	1	7	0	7	0	0	0	0	0	7	0	7	0	0	0	7	0	0	7	7	0	0	7
8	8	7	10	6	7	9	8	0	0	0	6	6	8	7	6	0	0	6	7	6	6	7	6	6	6	8
0	0	5	10	0	6	0	6	0	0	0	6	6	0	6	5	0	0	0	6	0	0	7	7	0	6	6
9	6	5	10	5	7	10	9	0	5	0	4	5	10	4	5	0	0	2	4	4	4	7	6	5	2	7
7	8	1	10	4	5	9	9	6	1	1	1	3	10	0	5	0	0	5	5	4	1	5	5	1	1	7
8	6	1	10	5	3	0	9	0	0	0	1	3	10	0	5	0	0	6	6	4	1	6	4	1	1	6
3	4	4	9	3	3	4	8	2	0	0	0	2	9	0	5	0	0	0	0	0	0	0	0	0	0	7
7	6	2	9	5	5	0	8	0	0	0	0	0	9	0	5	0	0	0	6	4	0	5	5	0	3	7
7	8	6	10	4	7	6	6	0	0	0	5	6	8	7	4	0	0	4	5	3	4	6	8	0	2	6
7	8	4	9	3	8	9	5	5	8	0	5	7	8	6	4	0	0	6	7	6	0	7	6	5	5	8
6	8	0	10	4	1	6	9	0	0	0	3	4	10	1	4	0	0	4	5	4	0	3	3	1	0	4
1.3	1	0	1.1	0	1.3	1.2	1.4	0	0	0	2.1	2	0	0	1.1	0	0	1.3	2	0	0	1.5	1.7	0	0	1.6
0	0	0	10	0	9	0	8	0	0	0	0	0	0	10	0	0	0	0	0	6	0	10	7	0	5	7
0	10	10	10	0	0	0	10	10	0	0	0	0	8	8	0	0	0	0	0	0	0	8	8	0	6	8
0	0	8	0	0	8	0	0	0	0	0	0	0	0	8	0	0	0	0	0	0	0	0	0	0	6	9
8	8	5	10	7	7	6	9	8	0	1	0	7	10	7	0	0	0	6	8	8	8	9	8	0	0	7
9	8.5	3	10	6	9.5	9	9	5	0	0	7	9	9.5	7	0	0	0	8.5	9	9	7	7	8	0	7.5	9
8	8	5	10	0	8	0	9	0	0	0	0	5	10	0	0	0	0	0	0	6	0	7	6	0	4	8
5	7	0	10	6	0	7	9	0	0	0	3	3	10	0	0	0	0	5	9	6	6	4	4	8	3	6
10	0	0	10	0	8	0	1	0	0	0	0	0	10	0	0	0	0	0	0	0	0	8	0	0	0	9
8	0	9	8	0	9	0	7	0	0	0	7	6	8	0	0	0	0	0	0	7	0	8	7	0	6	7
7	0	0	10	0	7.5	0	0	0	0	0	0	0	8	0	0	0	0	0	0	0	0	8	0	0	0	8
10	0	8	10	0	9	0	9	6	0	0	0	0	7	0	0	0	0	0	0	7	0	7	6	0	6	7
0	0	0	0	0	0	0	0	0	0	0	0	0	7	0	0	0	0	0	0	0	0	0	8	0	0	0
0	0	0	0	0	4	8	0	4	8	0	3	2	5	0	0	0	0	0	0	0	0	4	0	0	0	5
0	5	7	1	0	6	0	1	0	0	0	3	0	4	0	0	0	0	0	0	0	0	6	4	0	4	5
6	3	0	7	0	0	8	0	0	0	0	0	0	0	0	0	0	0	0	0	0	0	0	0	0	0	0
10	0	7.5	10	0	9	0	0	0	0	0	0	0	0	0	0	0	0	0	8	0	0	9	7	0	7	10
0	0	0	0	0	0	0	0	0	0	0	0	0	0	0	0	0	0	0	0	0	0	0	0	0	0	0
0	0	0	0	0	0	0	0	0	0	0	0	0	0	0	0	0	0	0	0	0	0	0	0	0	0	0
0	0	0	0	0	0	0	0	0	0	0	0	0	0	0	0	0	0	0	0	0	0	0	0	0	0	0
0	0	0	0	0	0	0	0	0	0	0	0	0	0	0	0	0	0	0	0	0	0	0	0	0	0	0

## Sheet: effective responses
JOURNAL OF THE AMERICAN MATHEMATICAL SOCIETY	8	10	8	7.5	6	7	9.8	9	8	7	10	7	10	0	10	9	8	8	8	10	9	9.6	5	10	7	10	8	10	3	10	9	8	7	10	10	8	10	10	8	9	10	9	10	9	5	10	10	0	4
TRANSACTIONS OF THE AMERICAN MATHEMATICAL SOCIETY	8	8	8	6.7	8	7	9	8	5	8	8	5	7	0	5	8	6	8	7	8	8	6.1	5	4	7	5	6	8	7	8	7	8	3	6	8	8	9	10	8	7	7	9	5	4	7	8	8	9	5
PROCEEDINGS OF THE AMERICAN MATHEMATICAL SOCIETY	7	7	8	5	8	5	7.9	6	8	7	7	3	5	0	6	8	6	7	6	7	7	4.9	4	3	7	4	7	5	7	8	0	7	3	5	6	7	8	10	8	7	9	9	5	5	5	8	8	0	6
MEMOIRS OF THE AMERICAN MATHEMATICAL SOCIETY	6	9	0	6	7	8	9	8	9	0	0	2	8	0	7	9	5	7	8	0	8	6	0	5	7	5	8	8	5	10	0	7	4	7	8	7	0	9	0	7	8	9	6	6	3	10	8	0	0
ADVANCES IN MATHEMATICS	7	7	0	7.5	6	8	9.8	6	6	9	8	7	8	0	7	10	7	7	8	9	10	8	0	6	0	5	8	9	3	9	3	8	0	6	9	8	10	0	7	5	8	8	9	7	8	10	10	0	0
PACIFIC JOURNAL OF MATHEMATICS	7	7	8	4	8	6	7	4	5	0	6	1	5	0	5	7	8	6	7	6	5	3.5	0	3	7	5	6	6	3	6	0	6	4	4	7	7	0	8	0	3	8	8	4	5	4	3	7	0	4
INDIANA UNIVERSITY MATHEMATICS JOURNAL	5	4	0	0	7	6	6.5	7	0	0	5	1	6	0	3	7	6	7	7	6	6	5.5	2	4	0	2	4	6	3	8	2	6	0	0	5	5	0	6	0	3	7	8	3	0	3	8	7	0	0
ANNALS OF MATHEMATICS	10	10	10	9	9	10	10	9	7	8	10	10	10	10	10	7	10	9	9	10	8	9.5	0	10	7	10	10	10	3	10	9	10	8	10	10	9	10	0	10	10	10	8	10	10	4	10	10	0	1
AMERICAN JOURNAL OF MATHEMATICS	9	9	10	7.5	6	10	9	5	9	5	8	0	8.5	0	6	8	8	8	9	9	8	0	0	8	7	5	10	9	3	9	4	8	6	8	10	7	0	0	0	5	8	9	8	5	5	10	9	0	5
BULLETIN OF THE AMERICAN MATHEMATICAL SOCIETY	8	3	0	6.7	4	6	9.2	7	7	7	8	4	9	7	7	10	7	8	8	7	9	5	4	1	7	8	8	9	5	9	3	7	4	7	7	5	8	10	7.5	6	7	9	5	4	4	8	6	8	6
DUKE MATHEMATICAL JOURNAL	8	9	10	8	5	6	9.5	8	0	8	9	6	8.8	0	8	9	6	5	8	9	8	8.7	0	9	7	8	9	0	3	9	8	8	5	9	8	5	1	5	0	8	9	8	9	8	4	10	9	0	1
MICHIGAN MATHEMATICAL JOURNAL	7	6	0	0	4	6	6.5	6	0	0	6	1	6	0	5	7	3	6	8	6	7	0	0	4	0	3	7	4	3	6	0	6	3	4	5	8	0	8	0	3	8	9	0	4	4	8	7	0	0
HOUSTON JOURNAL OF MATHEMATICS	4	2	0	0	6	5	4	3	0	0	0	2	0	0	3	7	5	5	6	5	4	0	3	3	0	1	3	4	5	2	0	6	0	1	5	4	0	3	0	3	0	8	1	0	2	2	6	0	3
ROCKY MOUNTAIN JOURNAL OF MATHEMATICS	7	4	6	2	4	5	4.2	4	0	0	4	1	4	5	0	7	2	5	6	5	3	0	0	0	0	1	5	4	3	2	0	6	3	1	3	8	0	7	0	3	0	8	0	3	3	2	6	6	4
NEW YORK JOURNAL OF MATHEMATICS	0	5	0	0	0	0	1	4	0	0	0	0	5	0	5	4	4	0	5	6	4	0	0	0	0	3	7	0	3	6	0	6	4	4	4	5	0	0	0	2	8	9	0	4	5	0	8	0	0
MATHEMATICAL INTELLIGENCER	5	0	0	4	3	3	1	3	0	0	0	2	2	8	2	6	0	0	4	5	5	3.9	0	0	0	1	6	4	3	3	0	0	3	0	5	5	0	2	0	1	0	8	0	0	2	1	6	0	0
AMERICAN MATHEMATICAL MONTHLY	5	2	10	5	3	2	7	4	7	0	5	0	3	9	2	9	6	4	5	5	5	3.5	0	0	0	5	7	5	5	3	4	7	5	7	2	7	0	10	0	3	5	7	0	2	4	5	5	8	7
COMMUNICATIONS ON PURE AND APPLIED MATHEMATICS	8	5	0	0	8	0	8	9	5	9	0	8	7	0	8	8	6	9	9	0	6	7	8	6	0	7	6	8	3	9	4	9	6	6	8	7	0	3	0	10	6	9	0	3	4	10	8	0	0
MATHEMATICAL RESEARCH LETTERS	6	6	0	6.7	4	0	8.5	7	0	0	0	6	6	0	6	0	4	6	5	8	8	0	0	4	0	4	7	7	3	8	0	6	0	7	6	6	0	2	0	2	6	8	6	6	2	10	8	0	0
JOURNAL OF MATHEMATICAL ANALYSIS AND APPLICATIONS	4	0	8	0	9	0	9.2	5	0	0	0	5	4	0	0	6	7	6	8	0	3	0	0	1	0	3	6	5	3	4	0	7	4	1	7	10	0	9	0	4	7	9	0	0	4	8	7	8	0
PURE AND APPLIED MATHEMATICS QUARTERLY	6	0	0	0	0	0	8	5	8	0	0	0	5	0	0	5	0	5	0	0	0	0	0	1	0	2	5	0	3	5	0	6	0	3	3	7	0	1	0	4	0	8	0	0	4	0	6	0	0
ASIAN JOURNAL OF MATHEMATICS	6	5	0	0	0	4	3	7	5	0	0	2	0	0	4	5	4	3	7	6	0	0	0	4	1	3	5	6	3	2	3	6	0	5	3	4	0	0	0	2	7	6	3	5	3	0	5	0	0
EXPERIMENTAL MATHEMATICS	5	3	10	5	2	0	2	4	0	0	0	3	5	8	5	7	0	5	0	7	7	4	4	0	0	1	8	0	3	2	2	0	0	0	4	7	0	0	0	3	8	0	3	3	0	0	7	0	0
LECTURE NOTES IN MATHEMATICS	7	9	0	8	8	8	8	7	7	7	0	9	9	6	0	8	4	4	8	8	8	0	0	4	7	7	7	6	10	7	5	6	5	7	6	9	0	7	0	4	0	8	7	8	5	8	7	0	0
FOUNDATIONS OF COMPUTATIONAL MATHEMATICS	7	0	0	0	6	0	0.5	4	0	0	0	0	0	0	0	8	0	8	0	0	0	0	8	0	0	1	6	0	3	2	0	0	0	0	3	7	0	0	0	3	0	9	0	0	0	0	7	0	0
HISTORIA MATHEMATICA	0	0	0	0	0	4	0.1	6	0	0	0	0	0	0	0	5	0	0	6	0	0	0	0	0	0	1	4	0	3	2	0	0	0	0	2	8	0	2	0	1	1	8	0	0	3	0	5	0	0
MATHEMATICAL CONTROL AND RELATED FIELDS	0	0	0	0	0	0	0.1	5	0	0	0	0	0	0	0	0	0	0	0	0	0	0	0	0	0	1	5	0	3	1	0	0	0	0	3	5	0	0	0	1	0	8	0	0	0	0	6	0	0
[truncated: 68 more columns]
